# Supplementary material for: A comprehensive study of the association between drug hepatotoxicity and daily dose, liver metabolism, and lipophilicity using 975 oral medications
Source: Oncotarget. 2015 Jun 24;6(19):17031–8. doi: 10.18632/oncotarget.4400 (PMC4627289; doi:10.18632/oncotarget.4400)
Supplement: Supplementary file 1 [file oncotarget-06-17031-s001.pdf]

## **SUPPLEMENTARY TABLES LEGENDS**

**Supplementary Table S1. All 5,015 drug records in the WHO ATC/DDD system**

**Supplementary Table S2. The 2,338 drugs with assigned DDDs**

**Supplementary Table S3. The 1,392 drugs that can be used orally**

**Supplementary Table S4. The 975 drugs analyzed in the present study**

**Supplementary Table S5. Predicting hepatic adverse drug reactions using the combination of Defined Daily Dose, liver metabolism or LogP**
